# Supplementary material for: Glycemic Challenge Is Associated with the Rapid Cellular Activation of the Locus Ceruleus and Nucleus of Solitary Tract: Circumscribed Spatial Analysis of Phosphorylated MAP Kinase Immunoreactivity
Source: MDPI journal article supplement (doi:10.3390/jcm12072483), 2023-03-24
Supplement: s1 [file s1]

**Supplemental Tables S1–S6 for Tapia et al. (*J. Clin. Med.*)**

**Table S1.** Summary of descriptive statistics for LC perikaryon profiles at Atlas Level 51

| Region   | Perikaryon phenotype                    | Saline |        |      |    | 2-DG |        |      |      |
|----------|-----------------------------------------|--------|--------|------|----|------|--------|------|------|
|          |                                         | n      | Median | Q1   | Q3 | n    | Median | Q1   | Q3   |
| LC (~51) | pERK1/2 <sup>+</sup>                    | 5      | 14.5   | 11.5 | 17 | 5    | 33     | 31.5 | 37.5 |
|          | DBH <sup>+</sup>                        | 5      | 73     | 73   | 86 | 5    | 97.5   | 92.5 | 97.5 |
|          | pERK1/2 <sup>+</sup> & DBH <sup>+</sup> | 5      | 1      | 0.5  | 1  | 5    | 0.5    | 0.5  | 1    |
|          | pERK <sup>+</sup> & DBH <sup>+</sup>    | 5      | 57     | 53   | 79 | 5    | 63.5   | 61.5 | 65   |
|          | pERK <sup>+</sup> & DBH <sup>+</sup>    | 5      | 13     | 11   | 16 | 5    | 32.5   | 30.5 | 37.5 |

**Table S2.** Summary of non-parametric test statistics and effect sizes for LC perikaryon profiles at Atlas Level 51

| Region   | Perikaryon phenotype                    | Sample size |      | Wilcoxon Rank-Sum test |                 |                              | Wilcoxon effect size |            |
|----------|-----------------------------------------|-------------|------|------------------------|-----------------|------------------------------|----------------------|------------|
|          |                                         | Saline      | 2-DG | Test statistic         | <i>p</i> -value | FDR-adjusted <i>p</i> -value | Effect size          | Magnitude* |
| LC (~51) | pERK1/2 <sup>+</sup>                    | 5           | 5    | 25                     | <b>0.01</b>     | <b>0.03</b>                  | <b>0.83</b>          | large      |
|          | DBH <sup>+</sup>                        | 5           | 5    | 21                     | 0.09            | 0.22                         | 0.56                 | large      |
|          | pERK1/2 <sup>+</sup> & DBH <sup>+</sup> | 5           | 5    | 6.5                    | 0.24            | 0.45                         | 0.40                 | moderate   |
|          | pERK1/2 <sup>+</sup> & DBH <sup>+</sup> | 5           | 5    | 14                     | 0.83            | 0.45                         | 0.10                 | small      |
|          | pERK1/2 <sup>+</sup> & DBH <sup>+</sup> | 5           | 5    | 25                     | <b>0.01</b>     | <b>0.03</b>                  | <b>0.83</b>          | large      |

\* 0.1 to < 0.3 – small, 0.3 to < 0.5 – moderate, and > or = 0.5 – large

**Table S3.** Summary of descriptive statistics for NTS and DMX perikaryon profiles at Atlas Level 67

| Region    | Perikaryon phenotype                                          | Saline |        |      |      | 2-DG |        |      |      |
|-----------|---------------------------------------------------------------|--------|--------|------|------|------|--------|------|------|
|           |                                                               | n      | Median | Q1   | Q3   | n    | Median | Q1   | Q3   |
| NTS (~67) | pERK1/2 <sup>+</sup>                                          | 6      | 1.7    | 1.2  | 2.5  | 5    | 6.1    | 6.1  | 7.2  |
|           | DBH <sup>+</sup>                                              | 6      | 2.1    | 1.6  | 2.3  | 5    | 2.9    | 2.7  | 3.9  |
|           | pERK1/2 <sup>+</sup> & DBH <sup>+</sup>                       | 6      | 1.6    | 0.9  | 2.0  | 5    | 4.2    | 4.0  | 5.5  |
|           | pERK1/2 <sup>+</sup> & DBH <sup>+</sup>                       | 6      | 1.7    | 1.3  | 2.3  | 5    | 1.0    | 0.8  | 2.1  |
|           | pERK1/2 <sup>+</sup> & DBH <sup>+</sup>                       | 6      | 0.2    | 0.2  | 0.3  | 5    | 1.9    | 1.7  | 2.1  |
| DMX (~67) | pERK1/2 <sup>+</sup>                                          | 6      | 5.4    | 3.3  | 6.1  | 5    | 6.1    | 4.5  | 8.7  |
|           | ChAT <sup>+</sup>                                             | 6      | 14.9   | 13.9 | 15.6 | 5    | 15.2   | 10.7 | 15.4 |
|           | DBH <sup>+</sup>                                              | 6      | 0.3    | 0.2  | 0.3  | 5    | 0.9    | 0.7  | 1.0  |
|           | pERK1/2 <sup>+</sup> , ChAT <sup>+</sup> , & DBH <sup>+</sup> | 6      | 0      | 0    | 0    | 5    | 0      | 0    | 0    |
|           | pERK1/2 <sup>+</sup> , ChAT <sup>+</sup> , & DBH <sup>+</sup> | 6      | 9.4    | 8.1  | 10.7 | 5    | 6.5    | 5.2  | 8.5  |
|           | pERK1/2 <sup>+</sup> , ChAT <sup>+</sup> , & DBH <sup>+</sup> | 6      | 0      | 0    | 0    | 5    | 0      | 0    | 0    |
|           | pERK1/2 <sup>+</sup> , ChAT <sup>+</sup>                      | 6      | 5.4    | 3.3  | 6.1  | 5    | 6.1    | 4.5  | 8.7  |
|           | pERK1/2 <sup>+</sup> , DBH <sup>+</sup>                       | 6      | 0      | 0    | 0    | 5    | 0      | 0    | 0    |
|           | ChAT <sup>+</sup> , DBH <sup>+</sup>                          | 6      | 0.3    | 0.2  | 0.3  | 5    | 0.9    | 0.7  | 1.0  |
|           | pERK1/2 <sup>+</sup> , ChAT <sup>+</sup> , & DBH <sup>+</sup> | 6      | 5.2    | 3.3  | 6.0  | 5    | 6.1    | 4.4  | 8.6  |
|           | pERK1/2 <sup>+</sup> , ChAT <sup>+</sup> , & DBH <sup>+</sup> | 6      | 0.2    | 0.04 | 0.2  | 5    | 0.9    | 0.7  | 0.9  |
|           | pERK1/2 <sup>+</sup> , ChAT <sup>+</sup> , & DBH <sup>+</sup> | 6      | 0      | 0    | 0    | 5    | 0      | 0    | 0    |
|           | pERK1/2 <sup>+</sup> , ChAT <sup>+</sup> , & DBH <sup>+</sup> | 6      | 0.2    | 0.03 | 0.2  | 5    | 0.2    | 0    | 0.2  |

**Table S4.** Summary of non-parametric test statistics and effect sizes for NTS and DMX perikaryon profiles at Atlas Level 67

| Region        | Perikaryon phenotype                                          | Sample size |      | Wilcoxon Rank-Sum test |                 |                              | Wilcoxon effect size |             |
|---------------|---------------------------------------------------------------|-------------|------|------------------------|-----------------|------------------------------|----------------------|-------------|
|               |                                                               | Saline      | 2-DG | Test statistic         | <i>p</i> -value | FDR-adjusted <i>p</i> -value | Effect size          | Magnitude * |
| NTS<br>(~ 67) | pERK1/2 <sup>+</sup>                                          | 6           | 5    | 30                     | <b>&lt;0.01</b> | <b>0.02</b>                  | 0.83                 | large       |
|               | DBH <sup>+</sup>                                              | 6           | 5    | 23                     | 0.17            | 0.38                         | 0.44                 | moderate    |
|               | pERK1/2 <sup>+</sup> & DBH <sup>-</sup>                       | 6           | 5    | 30                     | <b>&lt;0.01</b> | <b>0.02</b>                  | 0.83                 | large       |
|               | pERK1/2 <sup>-</sup> & DBH <sup>+</sup>                       | 6           | 5    | 10                     | 0.41            | 0.67                         | 0.28                 | small       |
|               | pERK1/2 <sup>+</sup> & DBH <sup>+</sup>                       | 6           | 5    | 29                     | <b>0.01</b>     | <b>0.02</b>                  | 0.78                 | large       |
| DMX<br>(~67)  | pERK1/2 <sup>+</sup>                                          | 6           | 5    | 18.5                   | 0.58            | 0.71                         | 0.19                 | small       |
|               | ChAT <sup>+</sup>                                             | 6           | 5    | 14                     | 0.93            | 1.00                         | 0.05                 | small       |
|               | DBH <sup>+</sup>                                              | 6           | 5    | 25.5                   | 0.06            | 0.19                         | 0.59                 | large       |
|               | pERK1/2 <sup>+</sup> , ChAT <sup>-</sup> , & DBH <sup>-</sup> | 6           | 5    | NA                     | NA              | NA                           | NA                   | NA          |
|               | pERK1/2 <sup>-</sup> , ChAT <sup>+</sup> , & DBH <sup>-</sup> | 6           | 5    | 4.5                    | 0.07            | 0.19                         | 0.58                 | large       |
|               | pERK1/2 <sup>-</sup> , ChAT <sup>-</sup> , & DBH <sup>+</sup> | 6           | 5    | NA                     | NA              | NA                           | NA                   | NA          |
|               | pERK1/2 <sup>+</sup> , ChAT <sup>+</sup>                      | 6           | 5    | 18.5                   | 0.58            | 0.71                         | 0.19                 | small       |
|               | pERK1/2 <sup>+</sup> , DBH <sup>+</sup>                       | 6           | 5    | NA                     | NA              | NA                           | NA                   | NA          |
|               | ChAT <sup>+</sup> , DBH <sup>+</sup>                          | 6           | 5    | 25.5                   | 0.06            | 0.19                         | 0.59                 | large       |
|               | pERK1/2 <sup>+</sup> , ChAT <sup>+</sup> , & DBH <sup>-</sup> | 6           | 5    | 18.5                   | 0.58            | 0.71                         | 0.19                 | small       |
|               | pERK1/2 <sup>-</sup> , ChAT <sup>+</sup> , & DBH <sup>+</sup> | 6           | 5    | 25                     | 0.08            | 0.19                         | 0.56                 | large       |
|               | pERK1/2 <sup>+</sup> , ChAT <sup>-</sup> , & DBH <sup>+</sup> | 6           | 5    | NA                     | NA              | NA                           | NA                   | NA          |
|               | pERK1/2 <sup>+</sup> , ChAT <sup>+</sup> , & DBH <sup>+</sup> | 6           | 5    | 16                     | 0.92            | 1.00                         | 0.06                 | small       |

\* 0.1 to &lt; 0.3 – small, 0.3 to &lt; 0.5 – moderate, and &gt; or = 0.5 – large

**Supplemental Tables S1–S6 for Tapia et al. (*J. Clin. Med.*)**

**Table S5.** Summary of descriptive statistics for NTS and DMX perikaryon profiles at atlas level 69

| Region       | Perikaryon phenotype                                          | Saline |        |      |      | 2-DG |        |      |      |
|--------------|---------------------------------------------------------------|--------|--------|------|------|------|--------|------|------|
|              |                                                               | n      | Median | Q1   | Q3   | n    | Median | Q1   | Q3   |
| NTS<br>(~69) | pERK1/2 <sup>+</sup>                                          | 6      | 3.6    | 3.5  | 4.0  | 4    | 8.3    | 8.3  | 9.3  |
|              | DBH <sup>+</sup>                                              | 6      | 9.7    | 9.3  | 10.4 | 4    | 12.6   | 11.3 | 13.7 |
|              | pERK1/2 <sup>+</sup> & DBH <sup>-</sup>                       | 6      | 2.9    | 2.2  | 3.0  | 4    | 5.7    | 5.3  | 6.1  |
|              | pERK1/2 <sup>-</sup> & DBH <sup>+</sup>                       | 6      | 8.9    | 8.4  | 9.5  | 4    | 8.8    | 8.3  | 9.5  |
|              | pERK1/2 <sup>+</sup> & DBH <sup>+</sup>                       | 6      | 0.8    | 0.7  | 1.1  | 4    | 2.9    | 2.7  | 3.6  |
| DMX<br>(~69) | pERK1/2 <sup>+</sup>                                          | 6      | 8.8    | 8.0  | 9.6  | 4    | 8.5    | 6.9  | 11.2 |
|              | ChAT <sup>+</sup>                                             | 6      | 20.9   | 20.3 | 21.4 | 4    | 17.0   | 16.2 | 18.8 |
|              | DBH <sup>+</sup>                                              | 6      | 0.1    | 0    | 0.1  | 4    | 0      | 0    | 0.04 |
|              | pERK1/2 <sup>+</sup> , ChAT <sup>-</sup> , & DBH <sup>-</sup> | 6      | 0      | 0    | 0    | 4    | 0      | 0    | 0    |
|              | pERK1/2 <sup>-</sup> , ChAT <sup>+</sup> , & DBH <sup>-</sup> | 6      | 11.9   | 11.5 | 12   | 4    | 8.0    | 7.5  | 8.8  |
|              | pERK1/2 <sup>-</sup> , ChAT <sup>-</sup> , & DBH <sup>+</sup> | 6      | 0      | 0    | 0    | 4    | 0      | 0    | 0    |
|              | pERK1/2 <sup>+</sup> , ChAT <sup>+</sup>                      | 6      | 8.8    | 8.0  | 9.6  | 4    | 8.5    | 6.9  | 11.2 |
|              | pERK1/2 <sup>+</sup> , DBH <sup>+</sup>                       | 6      | 0      | 0    | 0    | 4    | 0      | 0    | 0    |
|              | ChAT <sup>+</sup> , DBH <sup>+</sup>                          | 6      | 0.8    | 0    | 0.1  | 4    | 0      | 0    | 0.04 |
|              | pERK1/2 <sup>+</sup> , ChAT <sup>+</sup> , & DBH <sup>-</sup> | 6      | 8.0    | 9.6  | 1.6  | 4    | 6.9    | 11.2 | 4.4  |
|              | pERK1/2 <sup>-</sup> , ChAT <sup>+</sup> , & DBH <sup>+</sup> | 6      | 0.8    | 0    | 0.1  | 4    | 0      | 0    | 0.04 |
|              | pERK1/2 <sup>+</sup> , ChAT <sup>-</sup> , & DBH <sup>+</sup> | 6      | 0      | 0    | 0    | 4    | 0      | 0    | 0    |
|              | pERK1/2 <sup>+</sup> , ChAT <sup>+</sup> , & DBH <sup>+</sup> | 6      | 0      | 0    | 0    | 4    | 0      | 0    | 0    |

**Supplemental Tables S1–S6 for Tapia et al. (*J. Clin. Med.*)**

| <b>Table S6.</b> Summary of non-parametric test statistics and effect sizes for NTSm/DMX perikaryon profiles at Atlas Level 69 |                                                             |             |      |                        |                 |                      |            |
|--------------------------------------------------------------------------------------------------------------------------------|-------------------------------------------------------------|-------------|------|------------------------|-----------------|----------------------|------------|
| Region                                                                                                                         | Perikaryon phenotype                                        | Sample size |      | Wilcoxon Rank-Sum test |                 | Wilcoxon effect size |            |
|                                                                                                                                |                                                             | Saline      | 2-DG | Test statistic         | <i>p</i> -value | Effect size          | Magnitude* |
| NTSm (~ 69)                                                                                                                    | pERK1/2 <sup>+</sup>                                        | 6           | 4    | 24                     | <b>0.01</b>     | 0.82                 | large      |
|                                                                                                                                | DBH <sup>+</sup>                                            | 6           | 4    | 18                     | 0.24            | 0.40                 | moderate   |
|                                                                                                                                | pERK1/2 <sup>+</sup> , DBH <sup>-</sup>                     | 6           | 4    | 22.5                   | <b>0.03</b>     | 0.71                 | large      |
|                                                                                                                                | pERK1/2 <sup>-</sup> , DBH <sup>+</sup>                     | 6           | 4    | 11                     | 0.91            | 0.07                 | small      |
|                                                                                                                                | pERK1/2 <sup>+</sup> , DBH <sup>+</sup>                     | 6           | 4    | 24                     | <b>0.01</b>     | 0.82                 | large      |
| DMX (~69)                                                                                                                      | pERK1/2 <sup>+</sup>                                        | 6           | 4    | 11.5                   | 1.00            | 0.03                 | small      |
|                                                                                                                                | ChAT <sup>+</sup>                                           | 6           | 4    | 8                      | 0.45            | 0.27                 | small      |
|                                                                                                                                | DBH <sup>+</sup>                                            | 6           | 4    | 8.5                    | 0.46            | 0.27                 | small      |
|                                                                                                                                | pERK1/2 <sup>+</sup> , ChAT <sup>-</sup> , DBH <sup>-</sup> | 6           | 4    | NA                     | NA              | NA                   | NA         |
|                                                                                                                                | pERK1/2 <sup>-</sup> , ChAT <sup>+</sup> , DBH <sup>-</sup> | 6           | 4    | 3                      | 0.07            | 0.60                 | large      |
|                                                                                                                                | pERK1/2 <sup>-</sup> , ChAT <sup>-</sup> , DBH <sup>+</sup> | 6           | 4    | NA                     | NA              | NA                   | NA         |
|                                                                                                                                | pERK1/2 <sup>+</sup> , ChAT <sup>+</sup>                    | 6           | 4    | 11.5                   | 1.00            | 0.03                 | small      |
|                                                                                                                                | pERK1/2 <sup>+</sup> , DBH <sup>+</sup>                     | 6           | 4    | NA                     | NA              | NA                   | NA         |
|                                                                                                                                | ChAT <sup>+</sup> , DBH <sup>+</sup>                        | 6           | 4    | 8.5                    | 0.46            | 0.27                 | small      |
|                                                                                                                                | pERK1/2 <sup>+</sup> , ChAT <sup>+</sup> , DBH <sup>-</sup> | 6           | 4    | 11.5                   | 1.00            | 0.03                 | small      |
|                                                                                                                                | pERK1/2 <sup>-</sup> , ChAT <sup>+</sup> , DBH <sup>+</sup> | 6           | 4    | 8.5                    | 0.46            | 0.27                 | small      |
|                                                                                                                                | pERK1/2 <sup>+</sup> , ChAT <sup>-</sup> , DBH <sup>+</sup> | 6           | 4    | NA                     | NA              | NA                   | NA         |
|                                                                                                                                | pERK1/2 <sup>+</sup> , ChAT <sup>+</sup> , DBH <sup>+</sup> | 6           | 4    | 10                     | 0.54            | 0.25                 | small      |

\* 0.1 to < 0.3 – small, 0.3 to < 0.5 – moderate, and > or = 0.5 – large
